# Supplementary material for: Molecular and Functional Characterization of Grapevine NIPs through Heterologous Expression in aqy-Null Saccharomyces cerevisiae
Source: MDPI journal article supplement (doi:10.3390/ijms21020663), 2020-01-19
Supplement: s1 [file s1]

|               | Loop D      |
|---------------|-------------|
| AtNIP1;2      | TDNRAIG203  |
| AtNIP4;1      | TDNRAVG187  |
| AtNIP4;2      | TDSRATG187  |
| GmNod26       | TDNRAVG182  |
| MtNIP2        | TDNRAIG182  |
| OsNIP1;1      | TDNRAIG192  |
| OsNIP1;2      | TDNRAIG214  |
| OsNIP1;3      | TDNRAIG198  |
| OsNIP1;4      | TDDQAVG200  |
| Ps Nod26      | TDNRAIG183  |
| VuNIP1;1      | TDNRAIG183  |
| VvPnNIP1;1    | TDNRAIG192  |
| → VvTnNIP1;1  | TDNRAIG192  |
| VvPnNIP3;1    | VVNKIYG186  |
| ZmNIP1;1      | TDNRAIG188  |
| AnNIP1;1      | TDTRAVG217  |
| AtNIP5;1      | TDTRAVG221  |
| AtNIP6;1      | TDTRAVG223  |
| AtNIP7;1      | CDFVQLG189  |
| OsNIP3;2      | TDPNNAVK238 |
| OsNIP3;3      | TDPNNAVK211 |
| OsNIP4;1      | TDGTAGK200  |
| VvPnNIP5;1    | TDTRAVG215  |
| → VvTnNIP5;1  | TDTRAVG215  |
| VvPnNIP6;1    | TDTRAVG224  |
| → VvTnNIP6;1M | TDTRAVG224  |
| → VvTnNIP6;1  | TDTRAVG224  |
| LjNIP6;1      | TDTRAVG226  |
| ZmNIP3;1      | TDTRAVG219  |
| CpNIP2;1      | TDTKAVG191  |
| CaNIP2;1      | TDPKAIG175  |
| OsNIP2;1      | TDTRAVG192  |
| OsNIP2;2      | TDSRAVG195  |
| VvPnNIP2;1    | TDTKAIG191  |
| VvTnNIP2;1    | TDTKAIG191  |
| VvPnNIP7;1    | SQPQSVS205  |
| ZmNIP2;1      | TDTRAVG190  |
| ZmNIP2;2      | TDSRAVG195  |
| ZmNIP2;3      | TDSRAVG198  |

**Figure S3:** Putative pH-sensitive sites at the cytoplasmic loop D for NIPs gating. Sequences obtained in the present study are marked with an arrow. The alignment is showing the absence of highly conserved His residue for pH-sensitivity in loop D of all aligned NIPs sequences. Whereas, the consecutive presence of acidic amino acids (Asp and Arg) was observed, which possibly present the internal pH-sensors at the cytoplasmic loop.
