# Supplementary material for: Molecular and Functional Characterization of Grapevine NIPs through Heterologous Expression in aqy-Null Saccharomyces cerevisiae
Source: MDPI journal article supplement (doi:10.3390/ijms21020663), 2020-01-19
Supplement: s1 [file s1]

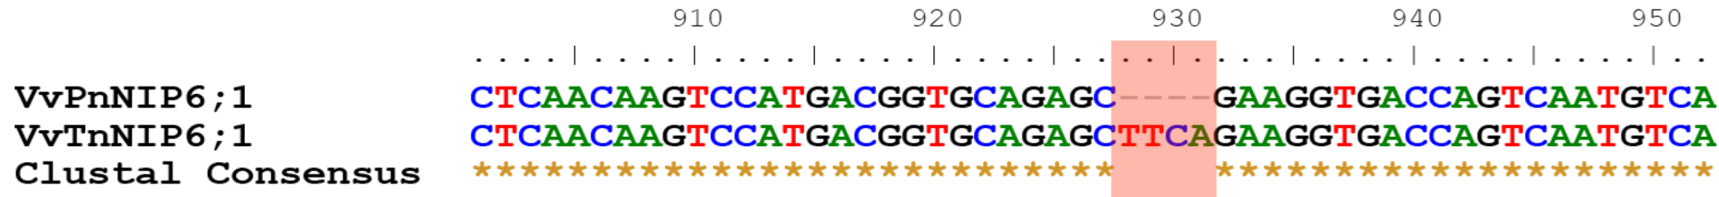

**Figure S1:** Alignment of grapevine *NIP6;1* of Pinot noir and Touriga nacional cultivar, showing the four base pair insertion in *VvTnNIP6;1* resulting in shorter protein.
