# Supplementary material for: Molecular and Functional Characterization of Grapevine NIPs through Heterologous Expression in aqy-Null Saccharomyces cerevisiae
Source: MDPI journal article supplement (doi:10.3390/ijms21020663), 2020-01-19
Supplement: s1 [file s1]

## Supplementary Tables:

**Table S1.** Primer sequences used in this study.

| Genes          | NCBI Accession Number | Primer Name | Primer Sequence (5'–3')                                  |
|----------------|-----------------------|-------------|----------------------------------------------------------|
| <i>NIP1;1</i>  | MN723560              | N11_F       | <u>GCGAGC</u> <u>TCTAGA</u> TAGCTAGAACTGATGGGCGAGATATCAG |
|                |                       | N11_R       | ATAC <u>CGCTCGAC</u> AGACCCATTACGGGACGATTTC              |
| <i>NIP5;1</i>  | MN723561              | N51_F       | <u>GCGAGC</u> <u>TCTAGA</u> TTCTCAATGGCGGAAGCAGAACTGG    |
|                |                       | N51_R       | ATAC <u>CGCTCGAC</u> CGGACGGAAGCTCCTGACC                 |
| <i>NIP6;1</i>  | MN723562              | N61_F       | <u>GCGAGC</u> <u>TCTAGA</u> ATGGACACAGACCATGATGTTCCATCAG |
|                |                       | N61_R       | ATAC <u>CGCTCGAC</u> TGTATTGTATGTACTGGCCGATCTCGATC       |
| <i>NIP6;1M</i> | MN723563              | N61_FM      | AAGTCCATGACGGTGCAGAGCGAAGGTGACCAGTCAATG                  |
|                |                       | N61_RM      | CATTGACTGGTCACCTTCGCTCTGCACCGTCATGGACTT                  |

\*Restriction enzyme sequences are underlined.

**Table S2.** Growth parameters of *S. cerevisiae* strains expressing grapevine NIPs on minimal media containing atypical substrates.

| Substrates                               | Growth parameters                          | Strains     |             |             |             |             |
|------------------------------------------|--------------------------------------------|-------------|-------------|-------------|-------------|-------------|
|                                          |                                            | pUG35       | NIP1;1      | NIP5;1      | NIP6;1      | NIP6;1M     |
| Control                                  | Specific growth rate (hour <sup>-1</sup> ) | 0.2±0.005   | 0.195±0.008 | 0.193±0.003 | 0.2±0.006   | 0.189±0.007 |
|                                          | Final biomass                              | 4.1±0.21    | 4.7±1.05    | 4.25±1.10   | 4.1±0.09    | 4.2±0.09    |
| Selenium (0.5mM)                         | Specific growth rate (hour <sup>-1</sup> ) | 0.089±0.005 | 0.036±0.003 | 0.102±0.004 | 0.036±0.005 | 0.13±0.007  |
|                                          | Final biomass                              | 3.48±1.05   | 0.80±1.03   | 3.24±1.03   | 1.35±1.08   | 2.62±1.04   |
| As (III) (0.5mM)                         | Specific growth rate (hour <sup>-1</sup> ) | 0.17±0.001  | 0.08±0.002  | 0.13±0.002  | 0.027±0.003 | 0.032±0.004 |
|                                          | Final biomass                              | 3.46±1.0    | 2.98±1.20   | 3.26±1.60   | 2.64±1.08   | 2.68±1.04   |
| As (V) (0.4mM)                           | Specific growth rate (hour <sup>-1</sup> ) | 0.056±0.002 | 0.106±0.005 | 0.068±0.003 | 0.101±0.004 | 0.067±0.003 |
|                                          | Final biomass                              | 2.65±1.03   | 3.30±1.03   | 2.69±1.04   | 3.6±1.03    | 3.38±1.05   |
| As (V) (0.4mM) (Phosphate-starved cells) | Specific growth rate (hour <sup>-1</sup> ) | 0.12±0.002  | ---         | 0.107±0.002 | ---         | ---         |
|                                          | Final biomass                              | 3.35±1.02   | ---         | 3.04±1.02   | ---         | ---         |
| Boric acid (30mM)                        | Specific growth rate (hour <sup>-1</sup> ) | 0.102±0.001 | 0.085±0.001 | 0.068±0.006 | 0.044±0.004 | 0.034±0.003 |
|                                          | Final biomass                              | 2.91±1.02   | 2.22±1.01   | 1.91±1.06   | 1.02±1.05   | 1.42±1.06   |
| H <sub>2</sub> O <sub>2</sub> (0.25mM)   | Specific growth rate (hour <sup>-1</sup> ) | 0.18±0.017  | 0.131±0.010 | 0.183±0.006 | 0.156±0.010 | 0.203±0.008 |
|                                          | Final biomass                              | 4.06±1.10   | 3.63±0.09   | 3.92±1.03   | 3.56±1.02   | 4.0±1.10    |
| Cadmium (2.0μM)                          | Specific growth rate (hour <sup>-1</sup> ) | 0.15±0.002  | 0.055±0.003 | 0.02±0.003  | 0.018±0.006 | 0.035±0.004 |
|                                          | Final biomass                              | 3.06±1.10   | 2.1±1.05    | 1.0±0.01    | 0.85±0.01   | 0.98±0.02   |
