# Supplementary material for: Molecular and Functional Characterization of Grapevine NIPs through Heterologous Expression in aqy-Null Saccharomyces cerevisiae
Source: MDPI journal article supplement (doi:10.3390/ijms21020663), 2020-01-19
Supplement: s1 [file s1]

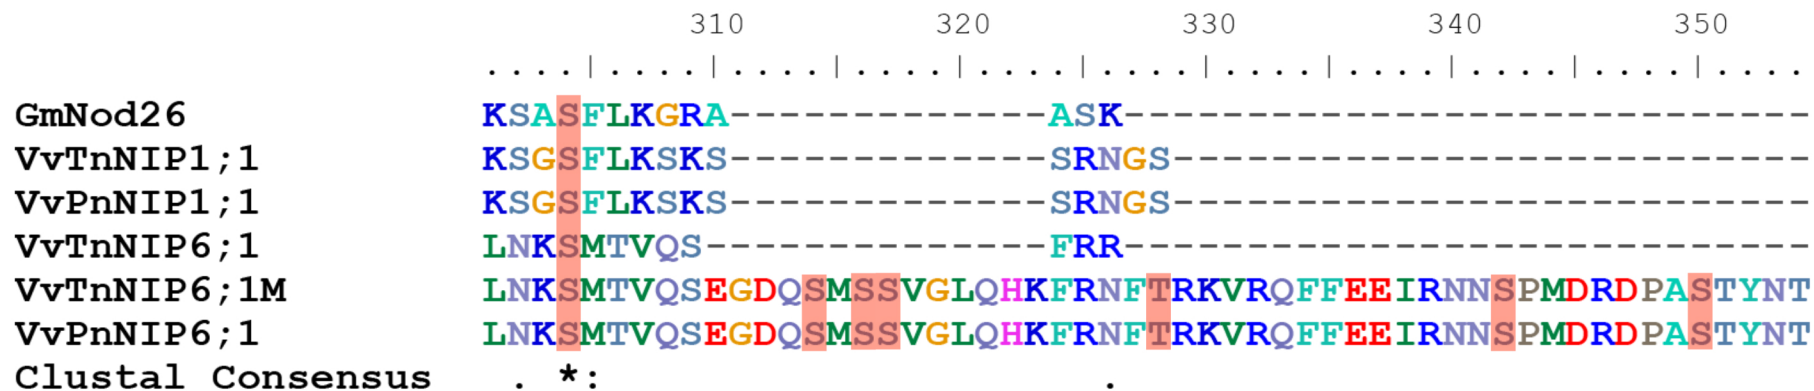

**Figure S2:** The alignment is showing the different C-terminal length of grapevine NIP6;1 of Pinot noir (VvPnNIP6;1) and Touriga nacional (VvTnNIP6;1) variety. C-terminal extension in mutated homolog (VvTnNIP6;1M) shows similarity with NIP6;1 homolog of Pinot noir cultivar. The alignment also exhibits the putative phosphorylation sites (highlighted in red) at C-terminal of functional grapevine NIPs obtained in the present study, and GmNod26 from *Glycine max*. Predicted phosphorylation sites at Ser residue at C-terminal are highlighted. The alignment shows six additional tentative phosphorylation sites in longer C-terminal homologs (VvPnNIP6;1 and VvTnNIP6;1M) .
